# Supplementary material for: Identification of amadori products and oligosaccharide-glycated amino acids in brewer’s spent grain extract
Source: Frontiers journal article supplement (doi:10.3389/frfst.2022.968865), 2022-08-30
Supplement: Table_1.XLSX [file Table_1.XLSX]

## Sheet: negative
RT	m/z	Compound	Adducts	Formula	Mass Error (ppm)
0.51	131.045	asparagine	M-H	C4H8N2O3	-8.97251
0.51	132.029	aspartic acid	M-H	C4H7NO4	-8.41402
0.51	469.2	fructosyl Lys hex	M-H	C12H24N2O7C6H10O5	-7.12774
0.51	146.045	glutamic acid	M-H	C5H9NO4	-7.44673
0.51	154.061	histidine	M-H	C6H9N3O2	-7.04692
0.51	259.021	phosphohexose	M-H	C6H13O9P	-6.02664
0.55	341.107	dihexose	M-H	C12H22O11	-5.6272
0.55	377.084	dihexose Cl35	M-H	C12H23O11Cl	-5.51041
0.55	439.083	dihexose phosphate	M-H	C12H22O11H3PO4	-7.33526
0.55	245.042	glycerophosphocholine	M-H	C6H15O8P	-5.63578
0.55	179.055	hexose	M-H	C6H12O6	-5.2698
0.55	161.045	hexose -H2O	M-H	C6O5H10	-5.3892
0.55	539.136	trihexose Cl35	M-H	C18H33O16Cl	-4.45094
0.55	541.134	trihexose Cl37	M-H	C8H18N18O11	0.919271
0.55	601.134	trihexose phosphate	M-H	C18H32O16H3PO4	-7.77977
0.59	869.274	hexahexose -120	M-H	C32H54O27	-4.12829
0.59	827.265	pentahexose	M-H	C30H52O26	-3.35954
0.59	707.222	pentahexose -120	M-H	C26H44O22	-4.17577
0.59	665.212	tetrahexose	M-H	C24H42O21	-4.39973
0.59	545.169	tetrahexose -120	M-H	C20H34O17	-6.06532
0.59	701.188	tetrahexose Cl35	M-H	C24H43O21Cl	-4.2488
0.59	503.159	trihexose	M-H	C18H32O16	-5.8611
0.59	383.117	trihexose -120	M-H	C14H24O12	-5.73997
0.63	763.186	tetrahexose phosphate	M-H	C24H42O21H3PO4	-7.44008
0.67	925.238	pentahexose phosphate	M-H	C30H52O26H3PO4	-6.91403
0.71	111.008	citrate	M-H	C5H4O3	-5.34383
0.71	191.019	citric acid	M-H	C6H8O7	-5.9377
0.75	989.317	hexahexose	M-H	C36H62O31	-3.69811
0.75	1087.29	hexahexose phosphate	M-H	C36H62O31H3PO4	-7.12492
0.75	1079.35	unknown hexahexose	M-H	C20H36N16O16C6O5H10C6O5H10	-1.48209
0.75	917.295	unknown pentahexose	M-H	C20H36N16O16C6O5H10	-0.391052
0.79	1151.37	heptahexose	M-H	C42H72O36	-4.28999
0.79	1031.33	heptahexose -120	M-H	C38H64O32	-4.31869
0.79	1313.42	octahexose	M-H	C48H82O41	-3.81483
0.79	1241.4	unknown heptahexose	M-H	C20H36N16O16C6O5H10C6O5H10C6O5H10	-2.18673
0.86	1475.47	nonahexose	M-H	C54H92O46	-3.11505
0.86	1193.38	octahexose -120	M-H	C44H74O37	-4.101
0.9	290.087	fructosyl p-Glu	M-H	C11H17NO8	-5.59124
0.9	260.113	fructosyl Val (fragment of fructosyl Val hex)	M-H	C11H19NO6	-5.60433
0.9	440.174	fructosyl Val hex	M-H	C11H21NO7C6O5H10	-6.90066
0.9	128.035	p-glutamic acid	M-H	C5H6NO3H	-6.18418
0.94	272.076	fructosyl p-Glu -H2O	M-H	C11H15NO7	-6.0798
0.94	163.039	hydroxyphenyllactic acid - H2O	M-H	C9H8O3	-6.00246
0.94	180.065	tyrosine	M-H	C9H11NO3	-6.42105
0.98	452.138	fructosyl p-Glu hex	M-H	C11H17NO8C6O5H10	-7.02705
0.98	419.128	fructosyl p-Glu-Glu	M-H	C10H14N2O6C6H10O5	-6.9703
1.02	614.19	fructosyl p-Glu dihex	M-H	C11H17NO8C12O10H20	-5.82158
1.02	117.019	succinic acid	M-H	C4H6O4	-5.27986
1.06	472.146	fructosyl Met hex	M-H	C11H21NO7SC6O5H10	-7.07314
1.06	602.226	fructosyl Val dihex	M-H	C11H21NO7C12O10H20	-6.26652
1.14	257.077	p-Glu-Glu	M-H	C10H14N2O6	-5.54345
1.22	504.168	fructosyl Tyr hex	M-H	C15H19NO7C6O6H12	-8.5916
1.25	776.243	fructosyl p-Glu trihex	M-H	C11H17NO8C18O15H30	-4.84363
1.37	282.083	guanosine	M-H	C10H13N5O5	-5.76703
1.49	938.295	fructosyl p-Glu tetrahex	M-H	C11H17NO8C24O20H40	-4.4941
1.57	292.138	fructosyl Ile/Leu	M-H	C12H23NO7	-5.95713
1.88	274.128	fructosyl Ile/Leu -H2O	M-H	C12H21NO6	-4.26482
1.88	454.19	fructosyl Ile/Leu hex	M-H	C12H23NO7C6O5H10	-5.48982
2.23	616.243	fructosyl Ile/Leu dihex	M-H	C12H23NO7C12H20O10	-4.92853
2.23	940.348	fructosyl Ile/Leu tetrahex	M-H	C12H23NO7C12H20O10C12H20O10	-3.51645
2.31	164.071	phenylalanine	M-H	C9H11NO2	-4.64067
2.66	778.295	fructosyl Ile/Leu trihex	M-H	C12H23NO7C12H20O10C6O5H10	-4.31467
2.78	353.144	p-Glu-Pro-Gln	M-H	C15H22N4O6	-6.13442
2.97	326.122	fructosyl Phe	M-H	C15H21NO7	-6.44257
2.97	164.071	phenylalanine	M-H	C9H11NO2	-5.39039
3.32	940.348	fructosyl Ile/Leu tetrahex	M-H	C12H23NO7C12H20O10C12H20O10	-3.62015
3.4	593.127	(epi)gallocatechin-(epi)catechin	M-H	C30H26O13	-5.29354
3.6	515.196	fructosyl p-Glu-Pro-Gln	M-H	C15H22N4O6C6H10O5	-6.89366
3.79	308.112	fructosyl Phe -H2O	M-H	C15H19NO6	-5.50146
3.79	488.174	fructosyl Phe hex	M-H	C15H21NO7C6O5H10	-6.26036
3.95	225.087	p-Glu-Pro	M-H	C10H14N2O4	-4.36438
4.14	341.107	dihexose	M-H	C12H22O11	-6.29704
4.26	137.024	hydroxybenzoic acid	M-H	C7H6O3	-6.94002
4.57	650.227	fructosyl Phe dihex	M-H	C15H21NO7C6O5H10C6O5H10	-5.14236
4.68	812.28	fructosyl Phe trihex	M-H	C15H21NO7C6O5H10C6O5H10C6O5H10	-3.59412
4.68	203.082	tryptophan	M-H	C11H12N2O2	-4.41562
4.72	181.049	hydroxyphenyllactic acid	M-H	C9H10O4	-6.06722
4.72	163.039	hydroxyphenyllactic acid - H2O	M-H	C9H8O3	-6.55827
5.11	253.118	pyrraline	M-H	C12H18N2O4	-5.94012
5.19	387.138	fructosyl p-Glu-Pro	M-H	C10H14N2O4C6H10O5	-6.9864
5.38	365.133	fructosyl Trp	M-H	C17H22N2O7	-6.61329
5.5	235.107	Ala-Phe	M-H	C12H16N2O3	-6.42946
5.65	812.28	fructosyl Phe trihex	M-H	C15H21NO7C6O5H10C6O5H10C6O5H10	-3.36679
5.69	308.112	fructosyl Phe -H2O	M-H	C15H19NO6	-6.03983
6.43	527.185	fructosyl Trp hex	M-H	C17H22N2O7C6O5H10	-6.49486
6.47	347.123	fructosyl Trp - H20	M-H	C17H20N2O6	-6.63503
6.9	121.029	4-hydroxybenzaldheyde	M-H	C7H6O2	-5.98338
6.94	227.102	p-Glu-Val	M-H	C10H16N2O4	-5.958
7.36	689.238	fructosyl Trp dihex	M-H	C17H22N2O7C12O10H20	-4.0133
7.75	577.132	procyanidin dimer	M-H	C30H26O12	-5.95451
8.25	289.07	catechin STANDARD	M-H	C15H14O6	-6.01811
9.18	227.139	Leu-Pro	M-H	C11H20N2O3	-6.35249
9.42	865.196	procyanidin trimer (C2)	M-H	C45H38O18	-2.58178
9.76	259.108	cyclo(Pro-Tyr)	M-H	C14H16N2O3	-5.10695
9.8	291.145	p-coumaroyl-hydroxyagmatine	M-H	C14H20N4O3	-5.86293
10.66	389.191	fructosyl Leu-Pro	M-H	C11H20N2O3C6H10O5	-5.36565
11.55	389.19	fructosyl Leu-Pro	M-H	C11H20N2O3C6H10O5	-6.2837
11.55	403.169	fructosyl p-Glu-Ile/Leu	M-H	C11H18N2O4C6H10O5	-7.11577
12.86	119.05	p-coumaric acid -CO2 STANDARD	M-H	C8H8O1	-5.18842
13.56	165.055	3-phenyllactic acid	M-H	C9H10O3	-5.93647
13.56	119.049	p-coumaric acid -CO2 STANDARD	M-H	C8H8O1	-6.8721
13.72	321.155	feruoyl-hydroxyagmatine	M-H	C15H22N4O4	-6.30767
14.07	241.118	p-Glu-Ile	M-H	C11H18N2O4	-5.81636
14.18	275.15	Coumaroylagmatine	M-H	C14H20N4O2	-5.6327
15.31	261.123	Pro-Phe	M-H	C14H18N2O3	-5.30214
15.65	241.118	p-Glu-Ile	M-H	C11H18N2O4	-5.01372
16.97	405.223	fructosyl Ile/Leu-Ile/Leu	M-H	HC12H22N2O2OHC6H10O5	-3.02626
17.16	611.292	dihydroxyhordatine B	M-H	C29H40N8O7	-3.97304
17.47	423.175	fructosyl Pro-Phe	M-H	C14H18N2O3C6H10O5	-6.62319
17.59	787.36	hordatine B hex FA	M-H	C35H50N8O10CH2O2	-3.87796
17.67	581.282	dihydroxyhordatine A	M-H	C28H38N8O6	-3.34311
17.75	549.293	hordatine A	M-H	C28H38N8O4	-2.63843
17.86	305.16	Feruloylagmatine	M-H	C15H22N4O3	-5.24687
17.86	803.356	hydroxyhordatine B hex FA	M-H	C29H40N8O6C6H10O5CH2O2	-3.20792
17.9	903.409	hordatine B dihex	M-H	C41H60N8O15	-1.2378
17.9	949.413	hordatine B dihex FA	M-H	C41H60N8O15CH2O2	-3.33289
18.1	757.35	hordatine A hexose FA	M-H	C34H48N8O9CH2O2	-3.36133
18.13	965.408	hydroxyhordatine B dihex FA	M-H	C29H40N8O6C6H10O5CH2O2C6H10O5	-3.13936
18.21	193.049	ferulic acid	M-H	C10H10O4	-5.68181
18.37	1081.45	hordatine A trihex FA	M-H	C40H58N8O14CH2O2C6H10O5	-3.15815
18.37	803.355	hydroxyhordatine B hex FA	M-H	C29H40N8O6C6H10O5CH2O2	-4.01092
18.52	405.221	fructosyl Ile/Leu-Ile/Leu	M-H	HC12H22N2O2OHC6H10O5	-7.18227
18.52	300.133	trp-pro	M-H	C16H19N3O3	-6.70646
18.79	581.281	dihydroxyhordatine A	M-H	C28H38N8O6	-5.63636
18.79	617.258	dihydroxyhordatine A chloride	M-H	C28H38N8O6HCl	-5.30891
18.79	627.286	dihydroxyhordatine A FA	M-H	C28H38N8O6CH2O2	-5.15186
18.79	1081.45	hordatine A trihex FA	M-H	C40H58N8O14CH2O2C6H10O5	-4.37088
18.83	611.292	dihydroxyhordatine B	M-H	C29H40N8O7	-5.01542
18.83	647.268	dihydroxyhordatine B chloride	M-H	C29H40N8O7HCl	-5.28858
18.83	657.297	dihydroxyhordatine B FA	M-H	C29H40N8O7CH2O2	-5.13234
18.87	747.322	hordatine A Hex chloride	M-H	C34H48N8O9HCl	-1.75464
18.87	757.35	hordatine A hex FA	M-H	C34H48N8O9CH2O2	-3.92292
18.91	787.361	hordatine B hex FA	M-H	C35H50N8O10CH2O2	-3.26192
18.95	873.397	hordatine A dihex	M-H	C40H58N8O14	-3.71973
18.95	909.373	hordatine A dihex chloride	M-H	C40H58N8O14HCl	-4.07445
18.95	919.403	hordatine A dihex FA	M-H	C40H58N8O14CH2O2	-3.05796
18.99	903.407	hordatine B dihex	M-H	C41H60N8O15	-3.80734
18.99	949.413	hordatine B dihex FA	M-H	C41H60N8O15CH2O2	-3.37078
19.03	375.128	riboflavin	M-H	C17H20N4O6	-6.80599
19.11	609.312	hordatine C	M-H	C30H42N8O6	-5.92685
19.15	581.281	dihydroxyhordatine A	M-H	C28H38N8O6	-5.028
19.22	325.091	feruloyl-pentose	M-H	C15H18O8	-5.89703
19.34	933.417	hordatine C dihex	M-H	C30H42N8O6C12O10H20	-4.13254
19.34	979.423	hordatine C dihex FA	M-H	C30H42N8O6C12O10H20CH2O2	-4.06265
19.38	609.312	hordatine C	M-H	C30H42N8O6	-6.17817
19.38	817.371	hordatine C hex FA	M-H	C30H42N8O6C6O5H10CH2O2	-3.85314
19.38	565.286	hydroxyhordatine A	M-H	C28H38N8O5	-5.24997
19.88	609.312	hordatine C	M-H	C30H42N8O6	-5.60957
19.88	595.297	hydroxyhordatine B	M-H	C29H40N8O6	-4.63957
20.08	593.148	saponarin	M-H	C27H30O15	-4.64032
20.27	439.208	fructosyl Ile/Leu-Phe	M-H	C15H22N2O3C6H10O5	-2.04639
20.31	447.089	luteolin-6-C-glucoside	M-H	C21H20O11	-8.85466
20.35	549.292	hordatine A	M-H	C28H38N8O4	-4.1332
20.35	595.297	hordatine A FA	M-H	C28H38N8O4CH2O2	-5.28174
20.35	565.286	hydroxyhordatine A	M-H	C28H38N8O5	-6.038
20.39	579.302	hordatine B	M-H	C29H40N8O5	-4.42427
20.39	625.307	hordatine B FA	M-H	C29H40N8O5CH2O2	-4.70339
20.62	563.137	isoschaftoside	M-H	C26H28O14	-5.91742
20.93	609.313	hordatine C	M-H	C30H42N8O6	-4.46734
20.93	314.207	Ile/Leu-Ala-Ile/Leu	M-H	C15H29N3O4	-5.5791
21.4	314.207	Ile/Leu-Ala-Ile/Leu	M-H	C15H29N3O4	-5.73017
21.52	431.096	Isovitexin	M-H	C21H20O10	-6.48648
21.71	287.055	dihydrokaempferol	M-H	C15H12O6	-4.54754
22.26	461.106	scoparin	M-H	C22H22O11	-6.3139
22.45	436.221	dicoumaroylspermidine	M-H	C25H31N3O4	-7.1307
22.57	593.148	kaempferol-3-O-rutinoside	M-H	C27H30O15	-6.08067
22.72	187.097	azelaic acid	M-H	C9H16O4	-3.40066
22.92	466.232	p-coumaroyl-feruloyl spermidine	M-H	C26H33N3O5	-6.38949
23.07	563.137	trihydroxyflavone pentahex	M-H	C26H28O14	-6.57165
23.54	356.253	Ile/Leu-Ile/Leu-Ile/Leu	M-H	HC18H33N3O3OH	-6.14939
24.01	356.253	Ile/Leu-Ile/Leu-Ile/Leu	M-H	HC18H33N3O3OH	-5.92327
25.6	201.112	sebacic acid	M-H	C10H18O4	-4.32603
26.03	439.185	diferuloylputrescine	M-H	C24H28N2O6	-5.59459
26.85	329.065	tricin	M-H	C17H14O7	-5.86303
27.9	329.065	tricin	M-H	C17H14O7	-5.45986
28.32	721.211	T-(4'-O-bt)-G-(4-O-bt)-G	M-H	C37H38O15	-4.5468
28.6	495.127	T-(4-O-bt)-H	M-H	C26H24O10	-5.67093
28.6	329.065	tricin	M-H	C17H14O7	-5.89042
28.67	721.211	T-(4'-O-bt)-G-(4-O-bt)-G	M-H	C37H38O15	-4.19408
28.95	525.137	T-(4'-O-bt)-G	M-H	C27H26O11	-5.38875
29.14	495.127	T-(4-O-bt)-H	M-H	C26H24O10	-6.10634
29.14	329.065	tricin	M-H	C17H14O7	-6.50449
29.53	525.137	T-(4'-O-bt)-G	M-H	C27H26O11	-5.72602
29.57	327.216	TriHODE	M-H	C18H32O5	-4.99343
30.89	327.216	TriHODE	M-H	C18H32O5	-5.48432
30.89	329.232	TriHOME	M-H	C18H34O5	-3.21335
32.02	327.216	TriHODE	M-H	C18H32O5	-5.71903
32.68	309.205	DiHOTRE	M-H	C18H30O4	-5.67173
33.58	309.205	DiHOTRE	M-H	C18H30O4	-5.88531
34	311.221	12,13-DiHODE	M-H	C18H32O4	-5.94115
34.16	578.307	PC(keto-18:2/0:0) FA	M-H	C26H48NO8PCH2O2	-5.82326
34.63	520.301	PC(O-18:2/0:0) -CH3	M-H	C25H48NO8P	-5.83298
34.9	309.205	DiHOTRE	M-H	C18H30O4	-6.19419
34.9	327.216	TriHODE	M-H	C18H32O5	-5.9366
34.98	331.247	9,10,13-trihydroxy-Octadecanoic acid	M-H	C18H36O5	-6.05895
35.02	520.301	PC(O-18:2/0:0) -CH3	M-H	C25H48NO8P	-6.32283
35.02	580.322	PC(O-18:2/0:0) FA	M-H	C26H50NO8PCH2O2	-5.35645
35.37	578.306	PC(keto-18:2/0:0) FA	M-H	C26H48NO8PCH2O2	-6.16982
35.6	580.323	PC(O-18:2/0:0) FA	M-H	C26H50NO8PCH2O2	-4.8563
35.6	520.302	PC(O-18:2/0:0)-CH3	M-H	C25H48NO8P	-5.63539
35.87	484.265	PC(12:0/0:0) FA	M-H	C20H42NO7PCH2O2	-6.96006
35.87	424.245	PC(12:0/0:0)-CH3	M-H	C19H40NO7P	-5.68126
35.95	578.307	PC(keto-18:2/0:0) FA	M-H	C26H48NO8PCH2O2	-5.3898
35.95	518.286	PC(keto-18:2/0:0)-CH3	M-H	C25H46NO8P	-6.0843
35.99	580.323	PC(O-18:2/0:0) FA	M-H	C26H50NO8PCH2O2	-4.90609
35.99	520.302	PC(O-18:2/0:0)-CH3	M-H	C25H48NO8P	-5.69667
36.22	578.307	PC(keto-18:2/0:0) FA	M-H	C26H48NO8PCH2O2	-5.43225
36.22	518.286	PC(keto-18:2/0:0)-CH3	M-H	C25H46NO8P	-5.99898
36.49	580.322	PC(O-18:2/0:0) FA	M-H	C26H50NO8PCH2O2	-5.64759
36.49	520.301	PC(O-18:2/0:0)-CH3	M-H	C25H48NO8P	-6.25796
36.53	578.307	PC(keto-18:2/0:0) FA	M-H	C26H48NO8PCH2O2	-4.36206
36.53	518.286	PC(keto-18:2/0:0)-CH3	M-H	C25H46NO8P	-5.95963
36.88	313.238	12,13-DiHOME	M-H	C18H34O4	-0.80671
36.88	578.307	PC(keto-18:2/0:0) FA	M-H	C26H48NO8PCH2O2	-4.51128
36.88	329.231	TriHOME	M-H	C18H34O5	-6.03226
37.2	313.237	9,10-DiHOME	M-H	C18H34O4	-3.72797
37.2	329.231	TriHOME	M-H	C18H34O5	-7.92095
37.35	311.221	12,13-DiHODE	M-H	C18H32O4	-6.54209
37.7	798.366	PE(18:3/0:0) dihex	M-H	C23H42NO7PC12O10H20	-3.05438
37.82	512.297	PC(14:0/0:0) FA	M-H	C22H46NO7PCH2O2	-5.28369
37.82	452.276	PC(14:0/0:0)-CH3	M-H	C21H44NO7P	-5.47761
37.93	675.357	DGMG(18:3)	M-H	C33H56O14	-3.48604
37.93	721.363	DGMG(18:3) FA	M-H	C33H56O14CH2O2	-2.81279
37.93	962.434	PE(18:2/0:0) trihex	M-H	C23H44NO7PC12O10H20C6O5H10	-2.98633
37.93	593.271	PI(18:3/0:0)	M-H	C27H47O12P	-4.44043
38.01	636.313	PE(18:3/0:0) hex	M-H	C23H42NO7PC6O5H10	-4.11551
38.05	562.312	PC(18:3/0:0) FA	M-H	C26H48NO7PCH2O2	-4.66593
38.05	502.291	PC(18:3/0:0)-CH3	M-H	C25H46NO7P	-4.97548
38.05	1124.49	PE(18:2/0:0) tetrahex	M-H	C23H44NO7PC12O10H20C12O10H20	-2.34665
38.09	524.297	PC(15:1/0:0) FA	M-H	C23H46NO7PCH2O2	-5.46541
38.09	464.276	PC(15:1/0:0)-CH3	M-H	C22H44NO7P	-5.6053
38.17	512.297	PC(14:0/0:0) FA	M-H	C22H46NO7PCH2O2	-4.45634
38.17	452.276	PC(14:0/0:0)-CH3	M-H	C21H44NO7P	-4.82714
38.25	675.358	DGMG(18:3)	M-H	C33H56O14	-3.11357
38.25	721.363	DGMG(18:3) FA	M-H	C33H56O14CH2O2	-2.67454
38.25	962.435	PE(18:2/0:0) trihex	M-H	C23H44NO7PC12O10H20C6O5H10	-1.81657
38.28	474.26	PE(18:3/0:0)	M-H	C23H42NO7P	-4.95664
38.32	593.271	PI(18:3/0:0)	M-H	C27H47O12P	-4.34307
38.36	1079.63	PC(18:3/0:0) dimer FA	M-H	C26H48NO7PCH2O2C26H48NO7P	-0.215537
38.36	562.313	PC(18:3/0:0) FA	M-H	C26H48NO7PCH2O2	-4.02134
38.36	502.292	PC(18:3/0:0)-CH3	M-H	C25H46NO7P	-4.41549
38.36	455.239	PG(14:0/0:0)	M-H	C20H41O9P	-5.68671
38.48	800.382	PE(18:2/0:0) dihex	M-H	C23H44NO7PC12O10H20	-2.1491
38.52	1100.49	PE(16:0/0:0) tetrahex	M-H	C21H44NO7PC24O20H40	-2.73765
38.56	450.26	PE(16:1/0:0)	M-H	C21H42NO7P	-5.28727
38.63	526.312	PC(15:0/0:0) FA	M-H	C23H48NO7PCH2O2	-5.32851
38.63	538.312	PC(16:1/0:0) FA	M-H	C24H48NO7PCH2O2	-4.86509
38.63	776.382	PE(16:0/0:0) dihex	M-H	C21H44NO7PC12O10H20	-2.50925
38.67	505.254	PG(18:3/0:0)	M-H	C24H43O9P	-5.63366
38.71	938.435	PE(16:0/0:0) trihex	M-H	C21H44NO7PC18O15H30	-1.88702
38.75	677.373	DGMG(18:2)	M-H	C33H58O14	-3.1606
38.75	723.379	DGMG(18:2) FA	M-H	C33H58O14CH2O2	-2.72852
38.79	455.239	PG(14:0/0:0)	M-H	C20H41O9P	-5.76854
38.83	638.329	PE(18:2/0:0) hex	M-H	C23H44NO7PC6O5H10	-3.18817
38.87	1083.66	PC(18:2/0:0) dimer FA	M-H	C26H50NO7PC26H50NO7PCH2O2	-2.00159
38.87	564.329	PC(18:2/0:0) FA	M-H	C26H50NO7PCH2O2	-3.50713
38.87	504.307	PC(18:2/0:0)-CH3	M-H	C25H48NO7P	-4.90952
38.95	526.313	PC(15:0/0:0) FA	M-H	C23H48NO7PCH2O2	-4.61159
38.95	466.291	PC(15:0/0:0)-CH3	M-H	C22H46NO7P	-5.30803
38.95	595.286	PI(18:2/0:0)	M-H	C27H49O12P	-4.42328
38.98	776.382	PE(16:0/0:0) dihex	M-H	C21H44NO7PC12O10H20	-2.78739
39.02	295.227	9-HODE	M-H	C18H32O3	-3.59517
39.02	505.254	PG(18:3/0:0)	M-H	C24H43O9P	-6.0853
39.06	677.374	DGMG(18:2)	M-H	C33H58O14	-2.79486
39.06	723.379	DGMG(18:2) FA	M-H	C33H58O14CH2O2	-2.99505
39.1	476.276	PE(18:2/0:0)	M-H	C23H44NO7P	-4.25463
39.14	433.233	PA(18:2/0:0)	M-H	C21H39O7P	-7.54108
39.14	1083.66	PC(18:2/0:0) dimer FA	M-H	C26H50NO7PC26H50NO7PCH2O2	-1.40218
39.14	564.328	PC(18:2/0:0) FA	M-H	C26H50NO7PCH2O2	-4.05417
39.14	1602.99	PC(18:2/0:0) trimer FA	M-H	C26H50NO7PC26H50NO7PC26H50NO7PCH2O2	-0.388281
39.14	504.307	PC(18:2/0:0)-CH3	M-H	C25H48NO7P	-4.93341
39.14	520.301	PC(O-18:2/0:0)-CH3	M-H	C25H48NO8P	-7.48427
39.33	452.276	PE(16:0/0:0)	M-H	C21H44NO7P	-5.17372
39.33	614.329	PE(16:0/0:0) hex	M-H	C21H44NO7PC6O5H10	-3.54099
39.33	802.397	PE(18:1/0:0) dihex	M-H	C23H46NO7PC12H20O10	-2.98792
39.33	595.286	PI(18:2/0:0)	M-H	C27H49O12P	-4.32288
39.41	1035.66	PC(16:0/0:0) dimer FA	M-H	C24H50NO7PC24H50NO7PCH2O2	-1.37378
39.41	540.329	PC(16:0/0:0) FA	M-H	C24H50NO7PCH2O2	-3.80647
39.41	480.307	PC(16:0/0:0)-CH3	M-H	C23H48NO7P	-4.95294
39.57	571.286	PI(16:0/0:0)	M-H	C25H49O12P	-4.58488
39.61	653.373	DGMG(16:0)	M-H	C31H58O14	-3.33415
39.61	699.379	DGMG(16:0) FA	M-H	C31H58O14CH2O2	-2.34876
39.65	452.276	PE(16:0/0:0)	M-H	C21H44NO7P	-3.84466
39.65	905.563	PE(16:0/0:0) dimer	M-H	C21H44NO7PC21H44NO7P	-0.631971
39.68	1035.66	PC(16:0/0:0) dimer FA	M-H	C24H50NO7PC24H50NO7PCH2O2	-1.39149
39.68	540.329	PC(16:0/0:0) FA	M-H	C24H50NO7PCH2O2	-3.84834
39.68	1531	PC(16:0/0:0) trimer FA	M-H	C24H50NO7PC24H50NO7PC24H50NO7PCH2O2	0.324002
39.68	480.307	PC(16:0/0:0)-CH3	M-H	C23H48NO7P	-4.77418
39.72	478.291	PE(18:1/0:0)	M-H	C23H46NO7P	-4.98457
39.72	507.27	PG(18:2/0:0)	M-H	C24H45O9P	-5.38892
39.96	679.389	DGMG(18:1)	M-H	C33H60O14	-3.1636
39.96	725.395	DGMG(18:1) FA	M-H	C33H60O14CH2O2	-2.65929
40	279.232	FA(18:2)	M-H	C18H32O2	-3.88561
40	478.291	PE(18:1/0:0)	M-H	C23H46NO7P	-5.12758
40.03	571.286	PI(16:0/0:0)	M-H	C25H49O12P	-4.58171
40.07	1087.69	PC(18:1/0:0) dimer FA	M-H	C26H52NO7PC26H52NO7PCH2O2	-1.62184
40.07	566.344	PC(18:1/0:0) FA	M-H	C26H52NO7PCH2O2	-4.16956
40.07	506.323	PC(18:1/0:0)-CH3	M-H	C25H50NO7P	-4.68157
40.11	507.271	PG(18:2/0:0)	M-H	C24H45O9P	-3.26793
40.15	597.302	PI(18:1/0:0)	M-H	C27H51O12P	-5.05478
40.38	433.234	PA(18:2/0:0)	M-H	C21H39O7P	-5.68174
40.42	554.344	PC(17:0/0:0) FA	M-H	C25H52NO7PCH2O2	-4.60058
40.42	494.323	PC(17:0/0:0)-CH3	M-H	C24H50NO7P	-5.30521
40.42	592.36	PC(20:2/0:0) FA	M-H	C28H54NO7PCH2O2	-3.92142
40.42	532.338	PC(20:2/0:0)-CH3	M-H	C27H52NO7P	-5.25224
40.5	483.271	PG (16:0/0:0)	M-H	C22H45O9P	-4.0471
40.58	597.302	PI(18:1/0:0)	M-H	C27H51O12P	-4.34989
40.81	568.36	PC(18:0/0:0) FA	M-H	C26H54NO7PCH2O2	-4.10356
40.93	967.552	PG (16:0/0:0) dimer	M-H	C22H45O9PC22H45O9P	-1.33419
40.97	483.271	PG (16:0/0:0)	M-H	C22H45O9P	-3.11367
41.01	681.405	DGMG(18:0)	M-H	C33H62O14	-2.11938
41.01	727.41	DGMG(18:0) FA	M-H	C33H62O14CH2O2	-2.77163
41.05	876.558	PC(18:2/18:1-3OH) FA	M-H	C26H50NO7PC18H32O4CH2O2	-2.96099
41.12	1091.72	PC(18:0/0:0) dimer FA	M-H	C26H54NO7PC26H54NO7PCH2O2	-1.04064
41.12	568.36	PC(18:0/0:0) FA	M-H	C26H54NO7PCH2O2	-3.97262
41.12	508.339	PC(18:0/0:0)-CH3	M-H	C25H52NO7P	-4.4227
41.36	594.376	PC(20:1/0:0) FA	M-H	C28H56NO7PCH2O2	-3.49959
41.36	534.354	PC(20:1/0:0)-CH3	M-H	C27H54NO7P	-4.3087
41.78	852.558	PC(16:0/18:1-3OH) FA	M-H	C24H50NO7PC18H32O4CH2O2	-2.82714
41.78	792.537	PC(16:0/18:1-3OH)-CH3	M-H	C24H50NO7PC17H30O4	-3.23727
42.21	311.221	12,13-DiHODE RT 33.94	M-H	C18H32O4	-5.90042
42.21	295.226	13-HODE	M-H	C18H32O3	-4.92461
42.37	858.547	PC(18:2/18:2-2OH) FA	M-H	C44H80NO10PCH2O2	-3.59665
42.68	523.361	(18:2)glyceroAzelaic acid	M-H	C30H52O7	-5.58197
42.72	860.563	PC(18:2/18:1-2OH) FA	M-H	C44H82NO10PCH2O2	-3.27854
42.99	485.346	(16:0)glycerosuberic acid	M-H	C27H50O7	-5.73337
43.03	834.548	PC(16:0/18:2-2OH) FA	M-H	C24H50NO7PC18H30O3CH2O2	-3.25516
43.26	499.361	(16:0)glyceroAzelaic acid	M-H	C28H52O7	-5.87311
43.42	836.563	PC(16:0/18:1-2OH) FA	M-H	C24H50NO7PC18H32O3CH2O2	-3.88053
43.5	834.546	PC(16:0/18:2-2OH) FA	M-H	C24H50NO7PC18H30O3CH2O2	-5.51187
43.65	842.553	PC(18:2/18:2-OH) FA	M-H	C26H50NO7PC18H30O2CH2O2	-2.46358
43.65	782.531	PC(18:2/18:2-OH)-CH3	M-H	C26H50NO7PC17H28O2	-3.47824
44.2	758.531	PC(16:0/18:2-OH) -CH3	M-H	C24H50NO7PC17H28O2	-3.88368
44.2	818.553	PC(16:0/18:2-OH) FA	M-H	C24H50NO7PC18H30O2CH2O2	-2.74478
45.44	985.607	DGDG(18:2/18:2) FA	M-H	C51H88O15CH2O2	-3.21663

## Sheet: positive
RT	m/z	Compound	Adducts	Formula	Mass Error (ppm)
0.51	220.081	fructosyl Gly -H2O	M+H	C8H13NO6	-3.46557
0.51	309.165	fructosyl Lys	M+H	C12H24N2O7	-2.28686
0.51	258.11	glycerophosphocholine	M+H	C8H20NO6P	-1.13125
0.51	104.107	choline	M+H	C5H13NO	-1.96569
0.51	337.171	fructosyl Arg	M+H	C12H24N4O7	-2.95453
0.51	480.181	fructosyl His hex	M+H	C12H19N3O7C6O5H10	-3.17769
0.55	148.06	glutamic acid	M+H	C3H7N4O3	2.6083
0.55	325.112	dihexose -H2O	M+H	C12H20O10	-1.622
0.55	116.07	proline	M+H	C5H9NO2	-4.23376
0.55	234.096	fructosyl Ala -H2O	M+H	C9H15NO6	-3.6445
0.55	248.112	fructosyl GABA -H2O	M+H	C10H17NO6	-2.73611
0.55	266.122	fructosyl GABA	M+H	C10H19NO7	-3.79067
0.55	428.175	fructosyl GABA hex	M+H	C10H19NO7C6O5H10	-2.73836
0.59	278.123	fructosyl Pro	M+H	C11H19NO7	-2.57175
0.59	487.164	trihexose -H2O	M+H	C18H30O15	-2.53401
0.59	649.217	tetrahexose -H2O	M+H	C24H40O20	-1.65042
0.59	440.175	fructosyl Pro hex	M+H	C11H17NO6C6O6H12	-2.18771
0.59	422.165	fructosyl Pro hex -H2O	M+H	C11H17NO6C6O5H10	-2.57301
0.63	152.056	guanine	M+H	C5H5N5O	-5.27251
0.63	136.061	adenine	M+H	C5H5N5	-4.31201
0.7	829.282	pentahexose	M+H	C30H52O26	0.0830407
0.74	846.307	pentahexose +NH3	M+H	C30H52O26NH3	-1.46915
0.74	991.336	hexahexose	M+H	C30H52O26C6O5H10	1.37422
0.74	811.271	pentahexose -H2O	M+H	C30H50O25	-0.653444
0.74	973.324	hexahexose -H2O	M+H	C30H50O25C6O5H10	-0.215177
0.78	280.138	fructosyl Val	M+H	C11H21NO7	-3.16811
0.78	1135.38	heptahexose -H2O	M+H	C30H50O25C12O10H20	0.204801
0.78	262.128	fructosyl Val -H2O	M+H	C11H19NO6	-1.4974
0.9	294.1	fructosyl Met -H2O	M+H	C11H19NO6S	-2.31775
0.9	130.049	p-glutamic acid	M+H	C5H6NO3H	-4.54137
0.9	442.191	fructosyl Val hex	M+H	C11H19NO6C6O6H12	-2.77041
0.9	424.18	fructosyl Val hex -H2O	M+H	C11H19NO6C6O5H10	-2.04978
0.94	147.044	p-coumaric acid -H2O STANDARD	M+H	C9H6O2	-3.39399
0.94	182.081	tyrosine	M+H	C9H11NO3	-3.34416
0.94	123.043	tyrosine fragment	M+H	C5H4N3O	5.95935
0.94	165.054	tyrosine -NH3	M+H	C9H8O3	-3.62565
0.94	136.075	tyrosine -FA	M+H	C6H7N4	5.7753
1.01	344.133	fructosyl Tyr	M+H	C15H21NO8	-2.81499
1.01	326.122	fructosyl Tyr -H20	M+H	C15H19NO7	-4.17968
1.01	604.243	fructosyl Val dihex	M+H	C11H19NO6C6O6H12C6O5H10	-2.58904
1.05	474.163	fructosyl Met hex	M+H	C11H21NO7SC6O5H10	-2.25791
1.05	235.118	cyclo(His-Pro)	M+H	C11H14N4O2	-3.33176
1.09	138.09	tyramine	M+H	C8H11NO	-8.01069
1.13	259.092	p-Glu-Glu	M+H	C10H14N2O6	-2.70098
1.17	213.122	pro-pro	M+H	C10H16N2O3	-4.91109
1.21	506.185	fructosyl Tyr hex	M+H	C15H19NO7C6O6H12	-2.64242
1.21	488.174	fructosyl Tyr hex -H20	M+H	C15H19NO7C6O5H10	-4.24959
1.25	260.16	Gln-Leu/Ile	M+H	C11H21N3O4	-3.4302
1.29	203.222	spermine	M+H	C10H26N4	-4.85986
1.29	132.101	Ile/Leu	M+H	C6H13NO2	-4.88276
1.37	121.064	4-vinylphenol	M+H	C8H8O	-3.81126
1.4	185.091	cyclo(Pro-Ser)	M+H	C8H12N2O3	-3.83093
1.52	226.154	cyclo(pro-lys)	M+H	C11H19N3O2	-5.36203
1.56	294.154	fructosyl Ile/Leu	M+H	C12H23NO7	-2.56902
1.56	276.144	fructosyl Ile/Leu -H2O	M+H	C12H21NO6	-1.09866
1.72	152.056	guanine	M+H	C5H5N5O	-4.86027
1.91	456.207	fructosyl Ile/Leu hex	M+H	C12H23NO7C6O5H10	-1.62462
1.91	438.196	fructosyl Ile/Leu hex -H2O	M+H	C12H21NO6C6O5H10	-1.24899
2.22	600.248	fructosyl Ile/Leu dihex -H2O	M+H	C12H21NO6C6O5H10C6O5H10	-2.29089
2.22	618.259	fructosyl Ile/Leu dihex	M+H	C12H23NO7C6O5H10C6O5H10	-1.64842
2.3	254.161	cyclo(Pro-Arg)	M+H	C11H19N5O2	-2.2411
2.34	131.048	cinnamic acid -H2O STANDARD	M+H	C9H6O	-5.10785
2.34	166.086	phenylalanine	M+H	C9H11NO2	-2.63783
2.34	120.081	phenylalanine -CO2H2 120.07	M+H	C8H9N	0.654337
2.69	780.312	fructosyl Ile/Leu trihex	M+H	C12H21NO6C6O5H10C6O6H12C6O5H10	-1.32488
2.8	169.096	cyclo(Ala-Pro)	M+H	C8H12N2O2	-4.51284
2.96	292.117	fructosyl Phe -2H2O	M+H	C15H17NO5	-1.90499
2.96	310.128	fructosyl Phe -H2O	M+H	C15H19NO6	-1.05676
3	328.138	fructosyl Phe	M+H	C15H21NO7	-2.73394
3.27	292.201	p-Coumaroylsperimidine	M+H	C16H25N3O2	-3.51693
3.66	243.133	p-Glu-Ile	M+H	C11H18N2O4	-4.57297
3.77	490.191	fructosyl Phe hex	M+H	C15H21NO7C6O5H10	-2.61837
3.77	472.18	fructosyl Phe hex -H2O	M+H	C15H19NO6C6O5H10	-2.37689
3.93	227.102	p-Glu-Pro	M+H	C10H14N2O4	-3.22528
4.51	652.243	fructosyl Phe dihex	M+H	C15H21NO7C6O5H10C6O5H10	-2.17138
4.55	634.233	fructosyl Phe dihex -H2O	M+H	C15H19NO6C6O5H10C6O5H10	-1.82158
4.7	205.096	tryptophan	M+H	C11H12N2O2	-7.03143
4.7	146.06	Indole-carboxaldehyde	M+H	C9H7NO	-3.0896
4.7	188.07	tryptophan -NH3	M+H	C11H9NO2	-2.04627
5.36	367.149	fructosyl Trp	M+H	C17H22N2O7	-3.4476
5.36	349.138	fructosyl Trp -H2O	M+H	C17H20N2O6	-3.20383
5.67	293.161	p-coumaroylhydroxyagmatine	M+H	C14H20N4O3	-0.899852
6.28	195.113	cyclo(pro-pro)	M+H	C10H14N2O2	1.63933
6.44	511.191	fructosyl Trp hex -H2O	M+H	C17H20N2O6C6O5H10	-2.627
6.44	529.201	fructosyl Trp hex	M+H	C17H22N2O7C6O5H10	-2.83915
6.9	229.117	p-Glu-Val	M+H	C10H16N2O4	-4.08975
8.18	291.085	catechin STANDARD	M+H	C15H14O6	-3.43925
8.37	231.169	Val-Leu/Ile	M+H	C11H22N2O3	-5.60884
9.22	229.154	Leu-Pro	M+H	C11H20N2O3	-3.71821
9.68	261.123	cyclo(pro-tyr)	M+H	C14H16N2O3	-2.10994
9.87	293.16	p-coumaroylhydroxyagmatine	M+H	C14H20N4O3	-1.45014
10.88	197.127	cyclo(Val-Pro)	M+H	C10H16N2O2	-5.85007
11.96	265.154	feruloylputrescine	M+H	C14H20N2O3	-3.00078
13.81	323.17	feruoylhydroxyagmatine	M+H	C15H22N4O4	-3.21416
14.01	243.132	p-Glu-Ile	M+H	C11H18N2O4	-7.14027
14.28	277.166	coumaroylagmatine	M+H	C14H20N4O2	-0.787346
15.09	245.185	Leu/Ile-Leu/Ile	M+H	C12H24N2O3	-3.82534
15.4	263.138	Pro-Phe	M+H	C14H18N2O3	-2.95893
15.55	243.133	p-Glu-Ile	M+H	C11H18N2O4	-4.16758
17.37	613.308	dihydroxyhordatine B	M+H	C29H40N8O7	-2.85165
17.48	291.18	coumaroylagmatine	M+H	C15H22N4O2	-5.2416
17.71	743.371	hordatine B hex	M+H	C35H50N8O10	-2.25961
17.79	211.143	cyclo(Pro-Leu)	M+H	C11H18N2O2	-4.2719
17.91	307.175	feruloylagmatine	M+H	C15H22N4O3	-4.26779
17.99	905.423	hordatine B dihex	M+H	C41H60N8O15	-2.13202
18.14	177.053	ferulic acid -H2O STANDARD	M+H	C10H8O3	-7.01795
18.57	302.149	Trp-Pro	M+H	C16H19N3O3	-4.49387
18.61	277.117	p-Glu-Phe	M+H	C14H16N2O4	-3.35277
18.88	583.297	dihydroxyhordatine A	M+H	C28H38N8O6	-2.33557
18.92	613.308	dihydroxyhordatine B	M+H	C29H40N8O7	-2.2963
18.95	211.143	cyclo(Pro-Leu)	M+H	C11H18N2O2	-3.63821
18.95	713.36	hordatine A hex	M+H	C34H48N8O9	-1.91209
18.99	377.144	riboflavin	M+H	C17H20N4O6	-2.7195
18.99	743.37	hordatine B hex	M+H	C35H50N8O10	-2.364
19.03	905.424	hordatine B dihex	M+H	C41H60N8O15	-1.0787
19.03	875.413	hordatine A dihex	M+H	C40H58N8O14	-1.66171
19.07	279.168	Phe-Leu/Ile	M+H	C15H22N2O3	-10.1434
19.19	177.053	ferulic acid -H2O STANDARD	M+H	C10H8O3	-7.47288
19.26	583.303	dihydroxyhordatine A	M+H	C28H38N8O6	7.39686
19.46	567.302	hydroxyhordatine A	M+H	C28H38N8O5	-3.60238
19.54	597.312	hydroxyhordatine B	M+H	C29H40N8O6	-3.41785
19.96	611.328	hordatine C	M+H	C30H42N8O6	-3.09898
19.96	425.217	hordatine B -156	M+H	C23H28N4O4	-2.69569
19.96	567.302	hydroxyhordatine A	M+H	C28H38N8O5	-2.70847
19.96	597.313	hydroxyhordatine B	M+H	C29H40N8O6	-2.0102
20.04	595.165	saponarin	M+H	C27H30O15	-1.56012
20.16	627.323	hydroxyhordatine C	M+H	C30H42N8O7	-3.30321
20.2	279.168	Phe-Leu/Ile	M+H	C15H22N2O3	-8.09474
20.43	395.207	hordatine A -156	M+H	C22H26N4O3	-1.60347
20.43	551.308	hordatine A	M+H	C28H38N8O4	-1.81263
20.47	425.217	hordatine B -156	M+H	C23H28N4O4	-2.6934
20.47	581.318	hordatine B	M+H	C29H40N8O5	-1.61038
20.51	627.323	hydroxyhordatine C	M+H	C30H42N8O7	-2.79191
20.59	565.154	Isoschaftoside	M+H	C26H28O14	-1.95296
20.74	245.128	cyclo(Phe-Pro)	M+H	C14H16N2O2	-2.05613
21.01	316.222	Ile/Leu-Ala-Ile/Leu	M+H	C15H29N3O4	-3.41492
21.01	455.228	hordatine C -156	M+H	C24H30N4O5	-1.17698
21.01	611.329	hordatine C	M+H	C30H42N8O6	-1.86859
21.25	284.14	cyclo(trp-Pro)	M+H	C16H17N3O2	1.73246
21.44	316.222	Ile/Leu-Ala-Ile/Leu	M+H	C15H29N3O4	-4.15283
21.48	433.112	isovitexin	M+H	C21H20O10	-2.77536
21.67	374.227	Glu-Ile/Leu-Ile/Leu	M+H	C17H31N3O6	-3.34299
22.22	463.122	scoparin	M+H	C22H22O11	-2.53565
22.37	265.096	perlolyrine	M+H	C16H12N2O2	-3.15126
22.45	438.237	1,5 dicoumaroylspermidine	M+H	C25H31N3O4	-4.69513
22.96	468.247	p-coumaroyl-feruloylspermidine	M+H	C26H33N3O5	-5.76341
23.58	358.269	Ile/Leu-Ile/Leu-Ile/Leu	M+H	HC18H33N3O3OH	-3.20075
24.79	227.175	cyclo(Leu/Ile-Leu/Ile)	M+H	C12H22N2O2	-3.42912
25.22	227.175	cyclo(Leu/Ile-Leu/Ile)	M+H	C12H22N2O2	-3.73355
26	441.201	diferuloyl putrescine	M+H	C24H28N2O6	-1.37625
27.83	331.08	tricin	M+H	C17H14O7	-2.42473
28.53	497.143	T-(4-O-bt)-H	M+H	C26H24O10	-2.72464
28.92	527.153	T-(4'-O-bt)-G	M+H	C27H26O11	-3.03977
29.08	497.142	T-(4-O-bt)-H	M+H	C26H24O10	-3.50631
29.47	527.153	T-(4'-O-bt)-G	M+H	C27H26O11	-2.95729
30.83	295.226	9/13 oxoODE 151 dominant	M+H	C18H30O3	-3.04989
30.83	277.215	9/13 oxoODE -H2O	M+H	C18H28O2	-3.4739
33.71	261.221	9,10-DiHOME -3H2O	M+H	C18H28O	-2.82967
33.75	534.317	PC(keto-18:2/0:0)	M+H	C26H48NO8P	-3.67033
34.57	536.333	PC(O-18:2/0:0)	M+H	C26H50NO8P	-3.13133
34.96	518.323	PC(O-18:2/0:0) -H2O	M+H	C26H48NO7P	-2.72549
35.27	534.317	PC(keto-18:2/0:0)	M+H	C26H48NO8P	-4.23856
35.39	476.276	PE(18:3/0:0)	M+H	C23H42NO7P	-2.69618
35.5	277.215	9/13 oxoODE -H2O	M+H	C18H28O2	-3.87399
35.54	536.333	PC(O-18:2/0:0)	M+H	C26H50NO8P	-2.92185
35.54	518.323	PC(O-18:2/0:0) -H2O	M+H	C26H48NO7P	-2.50507
35.81	476.276	PE(18:3/0:0)	M+H	C23H42NO7P	-2.45298
35.81	440.276	PC(12:0/0:0)	M+H	C20H42NO7P	-2.09368
35.89	534.317	PC(keto-18:2/0:0)	M+H	C26H48NO8P	-3.09826
35.93	536.333	PC(O-18:2/0:0)	M+H	C26H50NO8P	-3.7836
35.93	518.323	PC(O-18:2/0:0) -H2O	M+H	C26H48NO7P	-2.65588
36.16	534.317	PC(keto-18:2/0:0)	M+H	C26H48NO8P	-2.89805
36.36	476.276	PE(18:3/0:0)	M+H	C23H42NO7P	-2.87919
36.44	518.323	PC(O-18:2/0:0) -H2O	M+H	C26H48NO7P	-2.36963
36.48	534.318	PC(keto-18:2/0:0)	M+H	C26H48NO8P	-2.51026
36.83	315.252	12,13-DiHOME	M+H	C18H34O4	-3.05004
36.83	279.231	9,10-DiHOME -2H2O	M+H	C18H30O2	-1.8125
36.83	297.241	12,13-DiHOME -H2O	M+H	C18H32O3	-3.20518
36.83	261.221	12,13-DiHOME -3H2O	M+H	C18H28O	-2.81289
36.83	534.317	PC(keto-18:2/0:0)	M+H	C26H48NO8P	-3.36275
37.02	322.273	Anandamide (18:3, n-3)	M+H	C20H35NO2	-3.88447
37.14	297.241	9,10-DiHOME -H2O	M+H	C18H32O3	-4.82455
37.14	279.231	9,10-DiHOME -2H2O	M+H	C18H30O2	-2.36104
37.14	315.252	12,13-DiHOME	M+H	C18H34O4	-2.23777
37.14	261.22	9,10-DiHOME -3H2O	M+H	C18H28O	-3.42669
37.61	322.272	anandamide (18:3, n-3)	M+H	C20H35NO2	-6.86367
37.65	800.381	PE(18:3/0:0) dihex	M+H	C23H42NO7PC12O10H20	-1.95707
37.84	281.246	FA(18:2)	M+H	C18H32O2	-4.94661
37.88	699.355	DGMG(18:3) Na	M+H	C33H55O14Na	-2.52255
38	638.328	PE(18:3/0:0) hex	M+H	C23H42NO7PC6O5H10	-2.94922
38.04	277.216	9/13 oxoODE -H2O	M+H	C18H28O2	-1.46662
38.04	518.323	PC(O-18:2/0:0) -H2O	M+H	C26H48NO7P	-1.40855
38.11	935.608	PC(14.0/0:0) dimer	M+H	C22H46NO7PC22H46NO7P	-2.17768
38.11	468.308	PC(14.0/0:0)	M+H	C22H46NO7P	-1.6112
38.19	281.246	FA(18:2)	M+H	C18H32O2	-5.79642
38.19	694.399	DGMG(18:3) NH4	M+H	C33H55O14NH4	-1.86944
38.19	964.45	PE(18:2/0:0) trihex	M+H	C23H44NO7PC18O15H30	-1.30296
38.19	699.355	DGMG(18:3) Na	M+H	C33H55O14Na	-2.43842
38.23	476.276	PE(18:3/0:0)	M+H	C23H42NO7P	-1.69194
38.27	261.221	9,10-DiHOME -3H2O	M+H	C18H28O	-2.57211
38.31	518.323	PC(O-18:2/0:0) -H2O	M+H	C26H48NO7P	-1.63763
38.43	802.398	PE(18:2/0:0) dihex	M+H	C23H44NO7PC12O10H20	-1.04542
38.47	1102.5	PE(16:0/0:0) tetrahex	M+H	C21H44NO7PC24O20H40	-1.32183
38.5	452.276	PE(16:1/0:0)	M+H	C21H42NO7P	-3.07839
38.58	494.322	PC(16:1/0:0)	M+H	C24H48NO7P	-3.3123
38.66	940.45	PE(16:0/0:0) trihex	M+H	C21H44NO7PC18O15H30	-1.3867
38.7	696.415	DGMG(18:2) NH4	M+H	C33H57O14NH4	-1.60428
38.7	701.371	DGMG(18:2) Na	M+H	C33H57O14Na	-1.62824
38.7	355.283	MG(18:2/0:0/0:0)	M+H	C21H38O4	-3.2877
38.7	245.226	FA(18:2) -2H2O	M+H	C18H28	-2.45232
38.78	640.345	PE(18:2/0:0) hex	M+H	C23H44NO7PC6O5H10	-1.05019
38.86	1039.67	PC(18:2/0:0) dimer	M+H	C26H50NO7PC26H50NO7P	-0.182852
38.86	542.32	PC(18:2/0:0) Na	M+H	C26H49NO7PNa	-2.73672
38.86	520.34	PC(18:2/0:0)	M+H	C26H50NO7P	0.182026
38.93	482.323	PC(15:0/0:0)	M+H	C23H48NO7P	-2.06039
38.93	778.398	PE(16:0/0:0) dihex	M+H	C21H44NO7PC12O10H20	-0.922339
38.97	279.231	9,10-DiHOME -2H2O	M+H	C18H30O2	-2.1346
38.97	597.302	PI(18:2/0:0)	M+H	C27H49O12P	-1.94349
38.97	579.291	PI(18:2/0:0) -H2O	M+H	C27H47O11P	-2.47019
38.97	261.221	12,13-DiHOME -3H2O	M+H	C18H28O	-1.95542
39.01	245.226	FA(18:2) -2H2O	M+H	C18H28	-2.56197
39.01	263.236	FA(18:2) -H2O	M+H	C18H30O	-2.29295
39.01	355.284	MG(18:2/0:0/0:0)	M+H	C21H38O4	-1.98525
39.01	517.336	MGMG(18:2)	M+H	C21H38O4C6O5H10	-2.72903
39.01	696.415	DGMG(18:2) NH4	M+H	C33H57O14NH4	-1.9411
39.01	701.37	DGMG(18:2) Na	M+H	C33H57O14Na	-2.0074
39.05	478.292	PE(18:2/0:0)	M+H	C23H44NO7P	-2.04013
39.09	542.32	PC(18:2/0:0) Na	M+H	C26H49NO7PNa	-2.5481
39.13	1039.67	PC(18:2/0:0) dimer	M+H	C26H50NO7PC26H50NO7P	0.0743981
39.13	1559	PC(18:2/0:0) trimer	M+H	C26H50NO7PC26H50NO7PC26H50NO7P	-2.37971
39.13	520.339	PC(18:2/0:0)	M+H	C26H50NO7P	-0.69841
39.25	677.371	DGMG(16:0) Na	M+H	C31H57O14Na	-1.3189
39.29	295.225	9/13 oxoODE 151 dominant	M+H	C18H30O3	-7.30061
39.33	313.273	C16:0 + 76 as fragment of lipids	M+H	C19H36O3	-3.52328
39.33	616.344	PE(16:0/0:0) hex	M+H	C21H44NO7PC6O5H10	-2.0657
39.36	991.671	PC(16:0/0:0) dimer	M+H	C24H50NO7PC24H50NO7P	-1.25231
39.36	496.341	PC(16:0/0:0)	M+H	C24H50NO7P	1.88342
39.4	277.215	9/13 oxoODE -H2O	M+H	C18H28O2	-3.75164
39.56	677.371	DGMG(16:0) Na	M+H	C31H57O14Na	-0.704827
39.56	672.415	DGMG(16:0) NH4	M+H	C31H57O14NH4	-1.6762
39.6	907.578	PE(16:0/0:0) dimer	M+H	C21H44NO7PC21H44NO7P	-0.868654
39.6	313.273	C16:0 + 76 as fragment of lipids	M+H	C19H36O3	-2.25224
39.6	454.293	PE(16:0/0:0)	M+H	C21H44NO7P	-0.784138
39.6	555.292	PI(16:0/0:0) -H2O	M+H	C25H47O11P	-2.10293
39.64	1487	PC(16:0/0:0) trimer	M+H	C24H50NO7PC24H50NO7PC24H50NO7P	-0.443208
39.64	991.672	PC(16:0/0:0) dimer	M+H	C24H50NO7PC24H50NO7P	0.00797246
39.68	496.34	PC(16:0/0:0)	M+H	C24H50NO7P	0.52861
39.91	703.386	DGMG(18:1) Na	M+H	C33H59O14Na	-2.07813
39.95	245.226	FA(18:2) -2H2O	M+H	C18H28	-2.08849
39.95	355.283	MG(18:2/0:0/0:0)	M+H	C21H38O4	-3.25775
39.95	480.307	PE(18:1/0:0)	M+H	C23H46NO7P	-2.73927
39.95	263.236	FA(18:2) -H2O	M+H	C18H30O	-2.71938
39.95	337.273	MG(18:2/0:0/0:0) -H2O	M+H	C21H36O3	-1.57154
39.99	297.24	9,10-DiHOME -H2O	M+H	C18H32O3	-9.42992
40.03	1043.7	PC(18:1/0:0) dimer	M+H	C52H104N2O14P2	0.039968
40.03	313.273	MG(16:0/0:0/0:0) -H2O	M+H	C19H36O3	-2.83609
40.03	522.355	PC(18:1/0:0)	M+H	C26H52NO7P	-1.65547
40.38	510.357	PC(17:0/0:0)	M+H	C25H52NO7P	2.31834
40.38	548.37	PC(20:2/0:0)	M+H	C28H54NO7P	-2.21579
40.46	313.273	MG(16:0/0:0/0:0) -H2O	M+H	C19H36O3	-2.08328
40.58	324.289	NAE(18:2)	M+H	C20H37NO2	-0.943591
40.62	261.221	12,13-DiHOME -3H2O	M+H	C18H28O	-1.68289
40.97	705.405	DGMG(18:0) Na	M+H	C33H61O14Na	3.36554
41.01	832.568	PC(18:2/18:1-3OH)	M+H	C26H50NO7PC18H32O4	-2.19853
41.05	550.39	PC(20:1/0:0)	M+H	C28H56NO7P	5.24338
41.05	482.324	PE(18:0/0:0)	M+H	C23H48NO7P	-0.728492
41.08	1047.74	dimer PC(18:0/0:0)	M+H	C52H108N2O14P2	0.418092
41.08	524.37	PC(18:0/0:0)	M+H	C26H54NO7P	-1.22431
41.2	300.289	NAE(16:0)	M+H	C18H37NO2	-3.1769
41.32	550.388	PC(20:1/0:0)	M+H	C28H56NO7P	2.45711
41.36	261.221	12,13-DiHOME -3H2O	M+H	C18H28O	-0.508368
41.48	263.236	FA(18:2) -H2O	M+H	C18H30O	-2.7768
41.48	245.226	FA(18:2) -2H2O	M+H	C18H28	-1.96335
41.48	337.273	MG(18:2/0:0/0:0) -H2O	M+H	C21H36O3	-2.6511
41.55	326.305	NAE(18:1)	M+H	C20H39NO2	-1.14717
41.59	662.398	enniatin B Na	M+H	C33H56N3O9Na	-1.16471
41.59	657.442	enniatin B NH4	M+H	C33H57N3O9NH3	-1.85035
41.59	640.416	enniatin B	M+H	C33H57N3O9	-1.87963
41.75	808.568	PC(16:0/18:1-3OH)	M+H	C24H50NO7PC18H32O4	-2.47567
42.14	281.247	FA(18:2)	M+H	C18H32O2	-3.52191
42.14	263.236	FA(18:2) -H2O	M+H	C18H30O	-2.58709
42.14	245.226	FA(18:2) -2H2O	M+H	C18H28	-2.38723
42.18	313.272	MG(16:0/0:0/0:0) -H2O	M+H	C19H36O3	-4.25116
42.34	814.557	PC(18:2/18:2-2OH)	M+H	C44H80NO10P	-2.3085
42.61	547.363	(18:2)glyceroAzelaic acid Na	M+H	C30H51O7Na	4.53143
42.61	245.225	FA(18:2) -2H2O	M+H	C18H28	-5.34193
42.69	816.573	PC(18:2/18:1-2OH)	M+H	C44H82NO10P	-2.08358
42.84	814.557	PC(18:2/18:2-2OH)	M+H	C44H80NO10P	-2.35353
43	790.558	PC(16:0/18:2-2OH)	M+H	C24H50NO7PC18H30O3	-1.59716
43.24	523.358	(16:0)glyceroAzelaic acid Na	M+H	C28H51O7Na	-4.45154
43.47	790.558	PC(16:0/18:2-2OH)	M+H	C24H50NO7PC18H30O3	-1.62216
43.63	820.544	PC(18:2/18:2-OH) Na	M+H	C26H50NO7PC18H29O2Na	-3.07507
43.63	798.562	PC(18:2/18:2-OH)	M+H	C26H50NO7PC18H30O2	-2.29959
43.63	780.55	PC(18:2/18:2-OH) -H2O	M+H	C26H48NO7PC18H30O	-4.48844
44.18	774.563	PC(16:0/18:2-OH)	M+H	C24H50NO7PC18H30O2	-1.69032
44.18	796.545	PC(16:0/18:2-OH) Na	M+H	C24H50NO7PC18H29O2Na	-1.724
44.18	756.553	PC(16:0/18:2-OH) -H2O	M+H	C24H50NO7PC18H28O	-1.67056
45.43	963.601	DGDG(18:2/18:2) Na	M+H	C51H87O15Na	-0.7212

## Sheet: legend 
name	position	explanation
-H2O	at the end of the compound ID	loss of water
-CO2	at the end of the compound ID	loss of CO2
hex	at the end of the compound ID	n. hexose(s) bound
phosphate	at the end of the compound ID	phosphate adduct
Cl 35	at the end of the compound ID	chloride isotope 35 adduct
Cl 37	at the end of the compound ID	chloride isotope 37 adduct
FA	at the end of the compound ID	formic acid adduct
FA	at the begin of the compound ID	fatty acid
Na	at the end of the compound ID	sodium adduct
NH4	at the end of the compound ID	ammonium adduct
-CH3	at the end of the compound ID	loss of methyl
DiHOME/TriHOME	compound ID	Di/trihydroxyoctadec-n-enoic acid
DiHODE/TriHODE	compound ID	Di/trihydroxyoctadec-n,n-enoic acid
DGMG	at the begin of the compound ID	digalactosyl monoacylglycerol
DGDG	at the begin of the compound ID	digalactosyl diacylglycerol
MG	at the begin of the compound ID	monoacylglycerol
NAE	at the begin of the compound ID	N-acylethanolamine
PE	at the begin of the compound ID	phosphatidylethanolamine
PI	at the begin of the compound ID	phosphatidylinositol
PC	at the begin of the compound ID	phosphatidylcholine

## Sheet: same compounds in neg and pos
RT	Adducts	m/z	Compound		RT	m/z	Compound	Adducts	Formula
0.51	M-H	146.045	glutamic acid		0.55	148.06	glutamic acid	M+H	C3H7N4O3
0.59	M-H	827.265	pentahexose		0.7	829.282	pentahexose	M+H	C30H52O26
0.75	M-H	989.317	hexahexose		0.74	991.336	hexahexose	M+H	C30H52O26C6O5H10
0.9	M-H	128.035	p-glutamic acid		0.9	130.049	p-glutamic acid	M+H	C5H6NO3H
0.9	M-H	440.174	fructosyl Val hex		0.9	442.191	fructosyl Val hex	M+H	C11H19NO6C6O6H12
0.94	M-H	180.065	tyrosine		0.94	182.081	tyrosine	M+H	C9H11NO3
1.06	M-H	602.226	fructosyl Val dihex		1.01	604.243	fructosyl Val dihex	M+H	C11H19NO6C6O6H12C6O5H10
1.06	M-H	472.146	fructosyl Met hex		1.05	474.163	fructosyl Met hex	M+H	C11H21NO7SC6O5H10
1.14	M-H	257.077	p-Glu-Glu		1.13	259.092	p-Glu-Glu	M+H	C10H14N2O6
1.22	M-H	504.168	fructosyl Tyr hex		1.21	506.185	fructosyl Tyr hex	M+H	C15H19NO7C6O6H12
1.88	M-H	274.128	fructosyl Ile/Leu -H2O		1.56	276.144	fructosyl Ile/Leu -H2O	M+H	C12H21NO6
1.88	M-H	454.19	fructosyl Ile/Leu hex		1.91	456.207	fructosyl Ile/Leu hex	M+H	C12H23NO7C6O5H10
2.23	M-H	616.243	fructosyl Ile/Leu dihex		2.22	618.259	fructosyl Ile/Leu dihex	M+H	C12H23NO7C6O5H10C6O5H10
2.31	M-H	164.071	phenylalanine		2.34	166.086	phenylalanine	M+H	C9H11NO2
2.66	M-H	778.295	fructosyl Ile/Leu trihex		2.69	780.312	fructosyl Ile/Leu trihex	M+H	C12H21NO6C6O5H10C6O6H12C6O5H10
2.97	M-H	326.122	fructosyl Phe		3	328.138	fructosyl Phe	M+H	C15H21NO7
3.79	M-H	308.112	fructosyl Phe -H2O		3.77	472.18	fructosyl Phe hex -H2O	M+H	C15H19NO6C6O5H10
3.95	M-H	225.087	p-Glu-Pro		3.93	227.102	p-Glu-Pro	M+H	C10H14N2O4
4.57	M-H	650.227	fructosyl Phe dihex		4.51	652.243	fructosyl Phe dihex	M+H	C15H21NO7C6O5H10C6O5H10
4.68	M-H	203.082	tryptophan		4.7	205.096	tryptophan	M+H	C11H12N2O2
5.38	M-H	365.133	fructosyl Trp		5.36	367.149	fructosyl Trp	M+H	C17H22N2O7
6.43	M-H	527.185	fructosyl Trp hex		6.44	529.201	fructosyl Trp hex	M+H	C17H22N2O7C6O5H10
9.18	M-H	227.139	Leu-Pro		9.22	229.154	Leu-Pro	M+H	C11H20N2O3
9.76	M-H	259.108	cyclo(Pro-Tyr)		9.68	261.123	cyclo(Pro-Tyr)	M+H	C14H16N2O3
13.72	M-H	321.155	feruoyl-hydroxyagmatine		13.81	323.17	feruoyl-hydroxyagmatine	M+H	C15H22N4O4
14.07	M-H	241.118	p-Glu-Ile		14.01	243.132	p-Glu-Ile	M+H	C11H18N2O4
14.18	M-H	275.15	Coumaroylagmatine		14.28	277.166	Coumaroylagmatine	M+H	C14H20N4O2
15.31	M-H	261.123	Pro-Phe		15.4	263.138	Pro-Phe	M+H	C14H18N2O3
15.65	M-H	241.118	p-Glu-Ile		15.55	243.133	p-Glu-Ile	M+H	C11H18N2O4
17.59	M-H	787.36	hordatine B hex FA		17.71	743.371	hordatine B hex	M+H	C35H50N8O10
17.86	M-H	305.16	Feruloylagmatine		17.91	307.175	Feruloylagmatine	M+H	C15H22N4O3
18.52	M-H	300.133	trp-pro		18.57	302.149	trp-pro	M+H	C16H19N3O3
18.79	M-H	581.281	Dihydroxyhordatine A		18.88	583.297	Dihydroxyhordatine A	M+H	C28H38N8O6
18.83	M-H	611.292	Dihydroxyhordatine B		18.92	613.308	Dihydroxyhordatine B	M+H	C29H40N8O7
18.87	M-H	757.35	hordatine A hex FA		18.95	713.36	hordatine A hex	M+H	C34H48N8O9
18.91	M-H	787.361	hordatine B hex FA		18.99	743.37	hordatine B hex	M+H	C35H50N8O10
18.95	M-H	873.397	hordatine A dihex		19.03	875.413	hordatine A dihex	M+H	C40H58N8O14
18.99	M-H	903.407	hordatine B dihex		19.03	905.424	hordatine B dihex	M+H	C41H60N8O15
19.03	M-H	375.128	riboflavin		18.99	377.144	riboflavin	M+H	C17H20N4O6
19.15	M-H	581.281	Dihydroxyhordatine A		19.26	583.303	Dihydroxyhordatine A	M+H	C28H38N8O6
19.38	M-H	609.312	hordatine C		19.96	611.328	hordatine C	M+H	C30H42N8O6
19.38	M-H	565.286	hydroxyhordatine A		19.46	567.302	hydroxyhordatine A	M+H	C28H38N8O5
19.88	M-H	595.297	hydroxyhordatine B		19.54	597.312	hydroxyhordatine B	M+H	C29H40N8O6
20.08	M-H	593.148	saponarin		20.04	595.165	saponarin	M+H	C27H30O15
20.35	M-H	549.292	hordatine A		20.43	551.308	hordatine A	M+H	C28H38N8O4
20.39	M-H	579.302	hordatine B		20.47	581.318	hordatine B	M+H	C29H40N8O5
20.62	M-H	563.137	Isoschaftoside		20.59	565.154	Isoschaftoside	M+H	C26H28O14
20.93	M-H	314.207	Ile/Leu-Ala-Ile/Leu		21.01	316.222	Ile/Leu-Ala-Ile/Leu	M+H	C15H29N3O4
21.4	M-H	314.207	Ile/Leu-Ala-Ile/Leu		21.44	316.222	Ile/Leu-Ala-Ile/Leu	M+H	C15H29N3O4
21.52	M-H	431.096	Isovitexin		21.48	433.112	Isovitexin	M+H	C21H20O10
22.26	M-H	461.106	scoparin		22.22	463.122	scoparin	M+H	C22H22O11
23.54	M-H	356.253	Ile/Leu-Ile/Leu-Ile/Leu		23.58	358.269	Ile/Leu-Ile/Leu-Ile/Leu	M+H	HC18H33N3O3OH
27.9	M-H	329.065	tricin		27.83	331.08	tricin	M+H	C17H14O7
28.6	M-H	495.127	T-(4-O-bt)-H		28.53	497.143	T-(4-O-bt)-H	M+H	C26H24O10
28.95	M-H	525.137	T-(4'-O-bt)-G		28.92	527.153	T-(4'-O-bt)-G	M+H	C27H26O11
29.14	M-H	495.127	T-(4-O-bt)-H		29.08	497.142	T-(4-O-bt)-H	M+H	C26H24O10
29.53	M-H	525.137	T-(4'-O-bt)-G		29.47	527.153	T-(4'-O-bt)-G	M+H	C27H26O11
34.16	M-H	578.307	PC(keto-18:2/0:0) FA		33.75	534.317	PC(keto-18:2/0:0)	M+H	C26H48NO8P
35.02	M-H	580.322	PC(O-18:2/0:0) FA		34.57	536.333	PC(O-18:2/0:0)	M+H	C26H50NO8P
35.37	M-H	578.306	PC(keto-18:2/0:0) FA		35.27	534.317	PC(keto-18:2/0:0)	M+H	C26H48NO8P
35.6	M-H	580.323	PC(O-18:2/0:0) FA		35.54	536.333	PC(O-18:2/0:0)	M+H	C26H50NO8P
35.95	M-H	578.307	PC(keto-18:2/0:0) FA		36.16	534.317	PC(keto-18:2/0:0)	M+H	C26H48NO8P
35.99	M-H	580.323	PC(O-18:2/0:0) FA		35.89	534.317	PC(keto-18:2/0:0)	M+H	C26H48NO8P
36.49	M-H	580.322	PC(O-18:2/0:0) FA		35.93	536.333	PC(O-18:2/0:0)	M+H	C26H50NO8P
36.53	M-H	578.307	PC(keto-18:2/0:0) FA		36.48	534.318	PC(keto-18:2/0:0)	M+H	C26H48NO8P
36.88	M-H	578.307	PC(keto-18:2/0:0) FA		36.83	534.317	PC(keto-18:2/0:0)	M+H	C26H48NO8P
37.7	M-H	798.366	PE(18:3/0:0) dihex		37.65	800.381	PE(18:3/0:0) dihex	M+H	C23H42NO7PC12O10H20
38.25	M-H	675.358	DGMG(18:3)		37.88	699.355	DGMG(18:3) Na	M+H	C33H55O14Na
38.25	M-H	721.363	DGMG(18:3) FA		38.19	694.399	DGMG(18:3) NH4	M+H	C33H55O14NH4
38.25	M-H	962.435	PE(18:2/0:0) trihex		38.19	964.45	PE(18:2/0:0) trihex	M+H	C23H44NO7PC18O15H30
38.28	M-H	474.26	PE(18:3/0:0)		38.23	476.276	PE(18:3/0:0)	M+H	C23H42NO7P
38.48	M-H	800.382	PE(18:2/0:0) dihex		38.43	802.398	PE(18:2/0:0) dihex	M+H	C23H44NO7PC12O10H20
38.52	M-H	1100.49	PE(16:0/0:0) tetrahex		38.47	1102.5	PE(16:0/0:0) tetrahex	M+H	C21H44NO7PC24O20H40
38.56	M-H	450.26	PE(16:1/0:0)		38.5	452.276	PE(16:1/0:0)	M+H	C21H42NO7P
38.63	M-H	538.312	PC(16:1/0:0) FA		38.58	494.322	PC(16:1/0:0)	M+H	C24H48NO7P
38.75	M-H	677.373	DGMG(18:2)		38.7	696.415	DGMG(18:2) NH4	M+H	C33H57O14NH4
38.75	M-H	723.379	DGMG(18:2) FA		38.7	701.371	DGMG(18:2) Na	M+H	C33H57O14Na
38.95	M-H	526.313	PC(15:0/0:0) FA		38.93	482.323	PC(15:0/0:0)	M+H	C23H48NO7P
38.95	M-H	595.286	PI(18:2/0:0)		38.97	597.302	PI(18:2/0:0)	M+H	C27H49O12P
38.98	M-H	776.382	PE(16:0/0:0) dihex		38.93	778.398	PE(16:0/0:0) dihex	M+H	C21H44NO7PC12O10H20
39.06	M-H	677.374	DGMG(18:2)		39.01	701.37	DGMG(18:2) Na	M+H	C33H57O14Na
39.1	M-H	476.276	PE(18:2/0:0)		39.05	478.292	PE(18:2/0:0)	M+H	C23H44NO7P
39.14	M-H	564.328	PC(18:2/0:0) FA		39.09	542.32	PC(18:2/0:0) Na	M+H	C26H49NO7PNa
39.33	M-H	614.329	PE(16:0/0:0) hex		39.33	616.344	PE(16:0/0:0) hex	M+H	C21H44NO7PC6O5H10
39.41	M-H	540.329	PC(16:0/0:0) FA		39.36	496.341	PC(16:0/0:0)	M+H	C24H50NO7P
39.61	M-H	653.373	DGMG(16:0)		39.25	677.371	DGMG(16:0) Na	M+H	C31H57O14Na
39.61	M-H	699.379	DGMG(16:0) FA		39.56	672.415	DGMG(16:0) NH4	M+H	C31H57O14NH4
39.65	M-H	452.276	PE(16:0/0:0)		39.6	454.293	PE(16:0/0:0)	M+H	C21H44NO7P
39.65	M-H	905.563	PE(16:0/0:0) dimer		39.64	991.672	PC(16:0/0:0) dimer	M+H	C24H50NO7PC24H50NO7P
39.68	M-H	540.329	PC(16:0/0:0) FA		39.68	496.34	PC(16:0/0:0)	M+H	C24H50NO7P
39.68	M-H	1531	PC(16:0/0:0) trimer FA		39.64	1487	PC(16:0/0:0) trimer	M+H	C24H50NO7PC24H50NO7PC24H50NO7P
39.72	M-H	478.291	PE(18:1/0:0)		39.95	480.307	PE(18:1/0:0)	M+H	C23H46NO7P
39.96	M-H	679.389	DGMG(18:1)		39.91	703.386	DGMG(18:1) Na	M+H	C33H59O14Na
40	M-H	279.232	FA(18:2)		42.14	281.247	FA(18:2)	M+H	C18H32O2
40.07	M-H	1087.69	PC(18:1/0:0) dimer FA		40.03	1043.7	PC(18:1/0:0) dimer	M+H	C52H104N2O14P2
40.07	M-H	566.344	PC(18:1/0:0) FA		40.03	522.355	PC(18:1/0:0)	M+H	C26H52NO7P
40.42	M-H	554.344	PC(17:0/0:0) FA		40.38	510.357	PC(17:0/0:0)	M+H	C25H52NO7P
40.42	M-H	592.36	PC(20:2/0:0) FA		40.38	548.37	PC(20:2/0:0)	M+H	C28H54NO7P
41.05	M-H	876.558	PC(18:2/18:1-3OH) FA		41.01	832.568	PC(18:2/18:1-3OH)	M+H	C26H50NO7PC18H32O4
41.12	M-H	1091.72	PC(18:0/0:0) dimer FA		41.08	1047.74	PC(18:0/0:0) dimer	M+H	C52H108N2O14P2
41.12	M-H	568.36	PC(18:0/0:0) FA		41.08	524.37	PC(18:0/0:0)	M+H	C26H54NO7P
41.36	M-H	594.376	PC(20:1/0:0) FA		41.05	550.39	PC(20:1/0:0)	M+H	C28H56NO7P
41.78	M-H	852.558	PC(16:0/18:1-3OH) FA		41.75	808.568	PC(16:0/18:1-3OH)	M+H	C24H50NO7PC18H32O4
42.37	M-H	858.547	PC(18:2/18:2-2OH) FA		42.34	814.557	PC(18:2/18:2-2OH)	M+H	C44H80NO10P
42.68	M-H	523.361	(18:2)glyceroAzelaic acid		42.61	547.363	(18:2)glyceroAzelaic acid Na	M+H	C30H51O7Na
42.72	M-H	860.563	PC(18:2/18:1-2OH) FA		42.84	814.557	PC(18:2/18:2-2OH)	M+H	C44H80NO10P
43.03	M-H	834.548	PC(16:0/18:2-2OH) FA		43	790.558	PC(16:0/18:2-2OH)	M+H	C24H50NO7PC18H30O3
43.26	M-H	499.361	(16:0)glyceroAzelaic acid		43.24	523.358	(16:0)glyceroAzelaic acid Na	M+H	C28H51O7Na
43.5	M-H	834.546	PC(16:0/18:2-2OH) FA		43.47	790.558	PC(16:0/18:2-2OH)	M+H	C24H50NO7PC18H30O3
43.65	M-H	842.553	PC(18:2/18:2-OH) FA		43.63	820.544	PC(18:2/18:2-OH) Na	M+H	C26H50NO7PC18H29O2Na
44.2	M-H	818.553	PC(16:0/18:2-OH) FA		44.18	796.545	PC(16:0/18:2-OH) Na	M+H	C24H50NO7PC18H29O2Na
45.44	M-H	985.607	DGDG(18:2/18:2) FA		45.43	963.601	DGDG(18:2/18:2) Na	M+H	C51H87O15Na
